# Supplementary material for: Endogenous catalase delays high-fat diet-induced liver injury in mice
Source: PubMed Central journal article supplement — Korean J Physiol Pharmacol. 2017 Apr 21;21(3):317–25. doi: 10.4196/kjpp.2017.21.3.317 (PMC5409117; doi:10.4196/kjpp.2017.21.3.317), 2017-04-21
Supplement: kjpp-21-317-s002.pdf [file kjpp-21-317-s002.pdf]

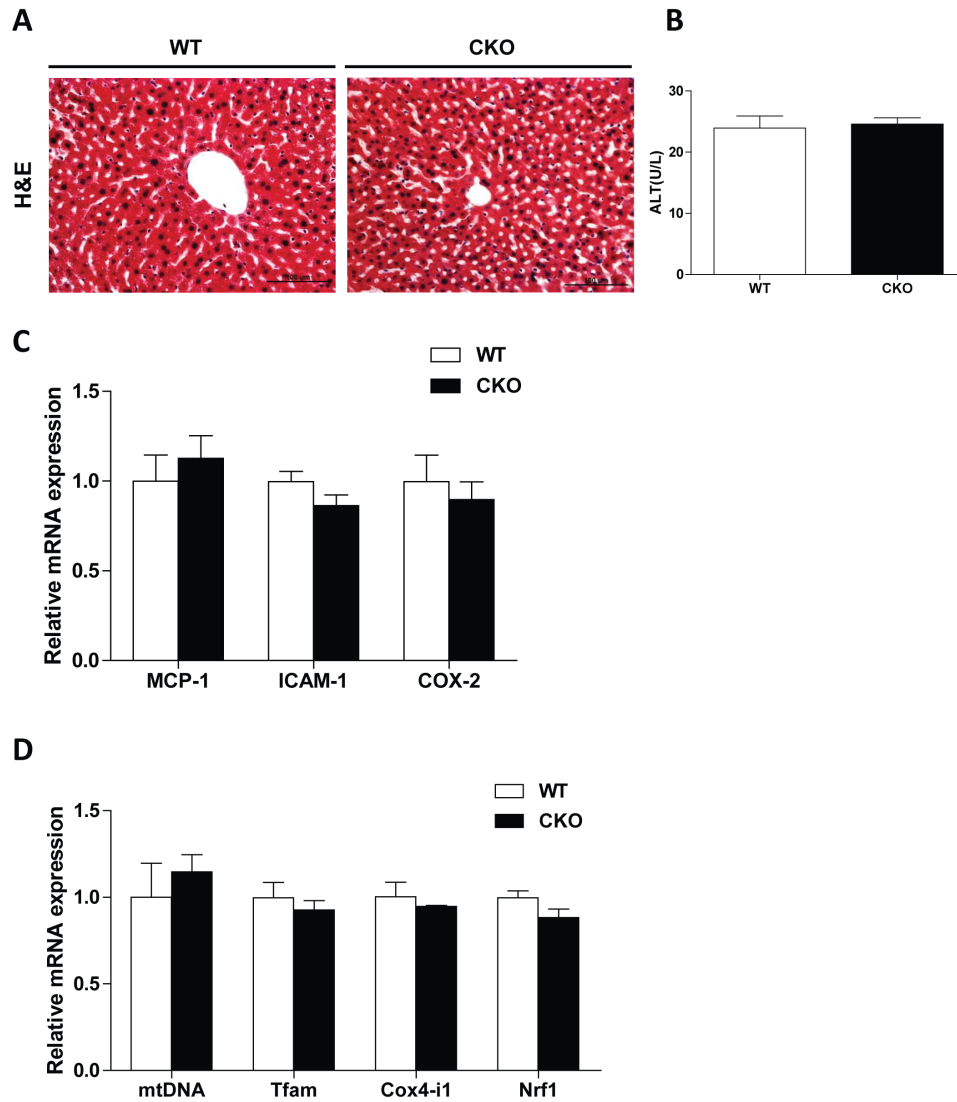

**Supplementary Fig. 2. Catalase deficiency does not change inflammation and mitochondrial biogenesis.** (A) The liver lipids detected by H&E. (B) Plasma ALT were measured. (C) Monocyte chemoattractant protein-1 (MCP-1), intercellular adhesion molecule 1 (ICAM-1), and cyclooxygenase-2 (COX2) were determined by real-time PCR. (D) Mitochondrial DNA (mtDNA), mitochondrial transcription factor A (Tfam), cytochrome c oxidase subunit 4 isoform 1 (COX4-i1), and nuclear respiratory factor 1 (Nrf1) mRNA expressions were measured by real-time PCR. Data are shown as mean $\pm$ SE of 3 mice per group.
