# Supplementary material for: Endogenous catalase delays high-fat diet-induced liver injury in mice
Source: PubMed Central journal article supplement — Korean J Physiol Pharmacol. 2017 Apr 21;21(3):317–25. doi: 10.4196/kjpp.2017.21.3.317 (PMC5409117; doi:10.4196/kjpp.2017.21.3.317), 2017-04-21
Supplement: kjpp-21-317-s003.pdf [file kjpp-21-317-s003.pdf]

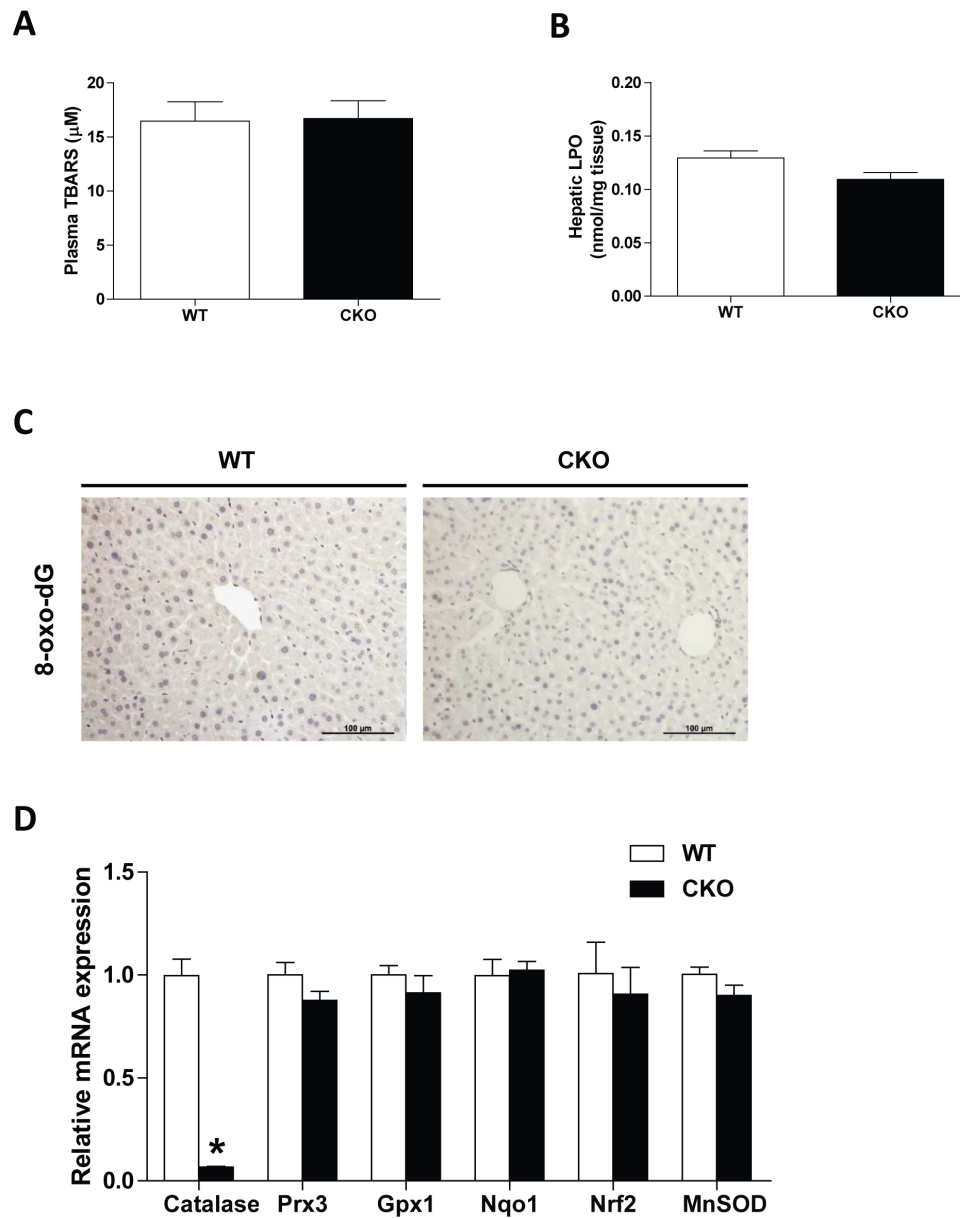

**Supplementary Fig. 3. Catalase deficiency does not change oxidative stress.** (A, B) Plasma and liver lipid peroxidation products were measured by LPO assay. (C) Representative 8-oxo-dG staining (1:200) in the liver. Magnification, 200x; scale bar, 100  $\mu\text{m}$ . (D) Catalase, peroxiredoxin 3 (Prx3), glutathione peroxidase (GPx1), NAD(P)H dehydrogenase (quinone)-1 (NQO1), nuclear factor (erythroid-derived 2) like-factor 2 (Nrf2), manganese superoxide dismutase (MnSOD) mRNA expressions were measured by real-time PCR. Data are shown as mean $\pm$ SE of 3 mice per group. \* $p$ <0.05 vs. WT.
